# Supplementary material for: Structural mechanism of laminin recognition by integrin
Source: PubMed Central journal article supplement (PMC8241838; doi:10.1038/s41467-021-24184-8), 2021-06-29
Supplement: 41467_2021_24184_MOESM1_ESM.pdf [file 41467_2021_24184_MOESM1_ESM.pdf]

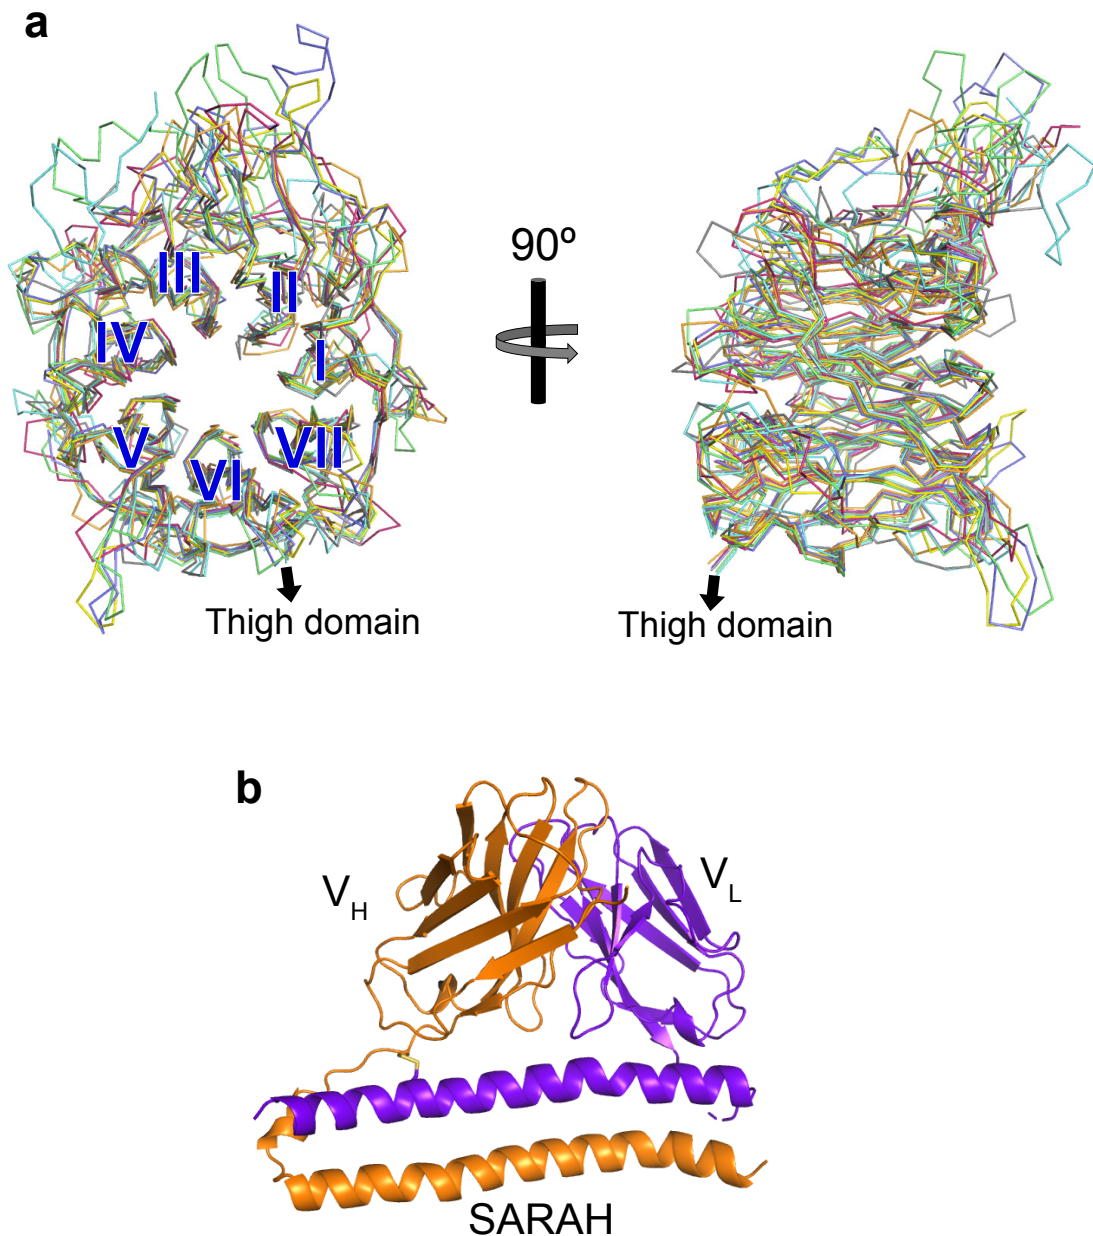

**Supplementary Fig. 1 Evaluation of the crystal structures.**

**a**, Structural comparison of the  $\beta$ -propeller domains in the available  $\alpha$  subunit structures. The  $\beta$ -propeller domain structures of  $\alpha 6$  (magenta),  $\alpha 5$  (PDB ID: 4wk0, slate),  $\alpha V$  (PDB ID: 5ffg, yellow),  $\alpha IIb$  (PDB ID: 3fcs, green),  $\alpha 4$  (PDB ID: 4irz, orange),  $\alpha L$  (PDB ID: 5e6s, gray), and  $\alpha X$  (PDB ID: 4neh, cyan) are superposed and shown as C $\alpha$ -trace representations. The 7  $\beta$ -sheets are denoted as blades I through VII and labeled. **b**, Crystal structure of the HUTS-4 Fv-clasp determined prior to the model building of the quaternary complex. V<sub>H</sub>-SARAH and V<sub>L</sub>-SARAH are shown in orange and purple, respectively.

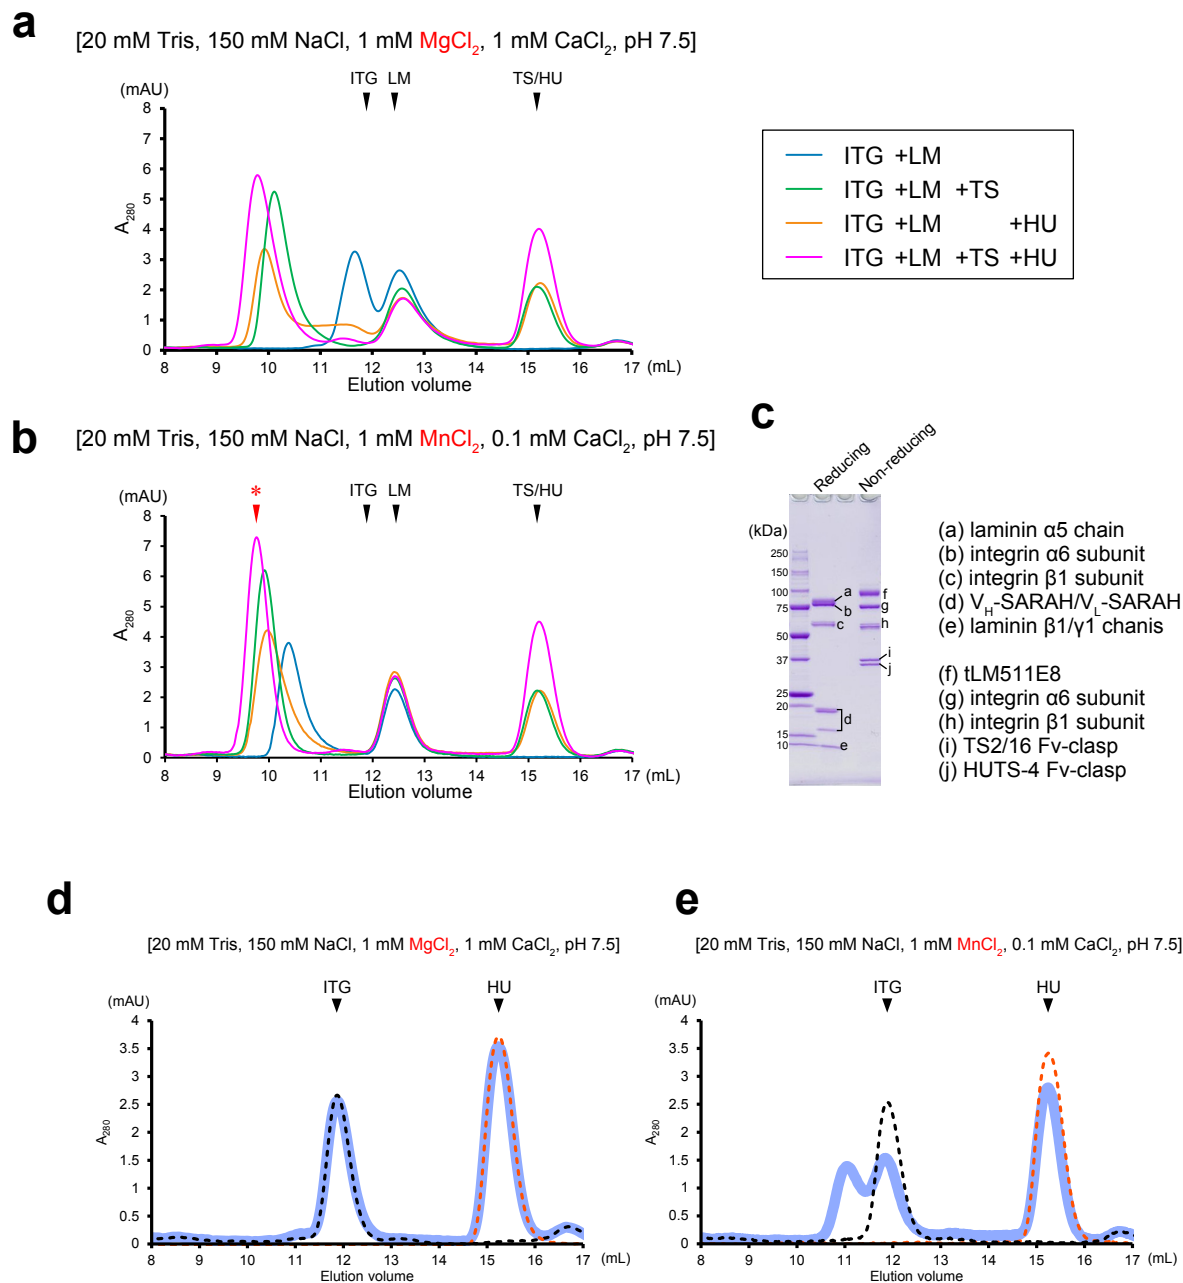

### Supplementary Fig. 2 Complex formation analyzed by size-exclusion chromatography (SEC).

**a, b**, SEC profiles of the mixtures of samples in the presence of 1 mM  $MgCl_2$ /1 mM  $CaCl_2$  (**a**) or 1 mM  $MnCl_2$ /0.1 mM  $CaCl_2$  (**b**). Chromatograms with different sample composition are shown in differently colored lines indicated in the key. ITG,  $\alpha6\beta1$  headpiece; LM, tLM511; TS, TS2/16 Fv-clasp, and HU, HUTS-4 Fv-clasp. The elution positions for individual component alone are indicated by black arrowheads. **c**, SDS-PAGE profile of the peak fraction sample (marked by a red asterisk in **b**) used for the cryo-EM observation. This experiment was repeated twice. Uncropped gel image is provided in the Source Data file. **d, e**, Binding of HUTS-4 Fv-clasp to  $\alpha6\beta1$ . SEC profiles in the presence of 1 mM  $MgCl_2$ /1 mM  $CaCl_2$  (**d**) or 1 mM  $MnCl_2$ /0.1 mM  $CaCl_2$  (**e**) are shown. The buffer compositions are provided above each chromatogram. SEC profiles of integrin alone (black dashed line), HUTS-4 Fv-clasp alone (orange dashed line), and their 1:1.5 mixture (thick blue line) are shown. The elution positions for individual component alone are indicated by black arrowheads (ITG,  $\alpha6\beta1$  headpiece; HU, HUTS-4 Fv-clasp).

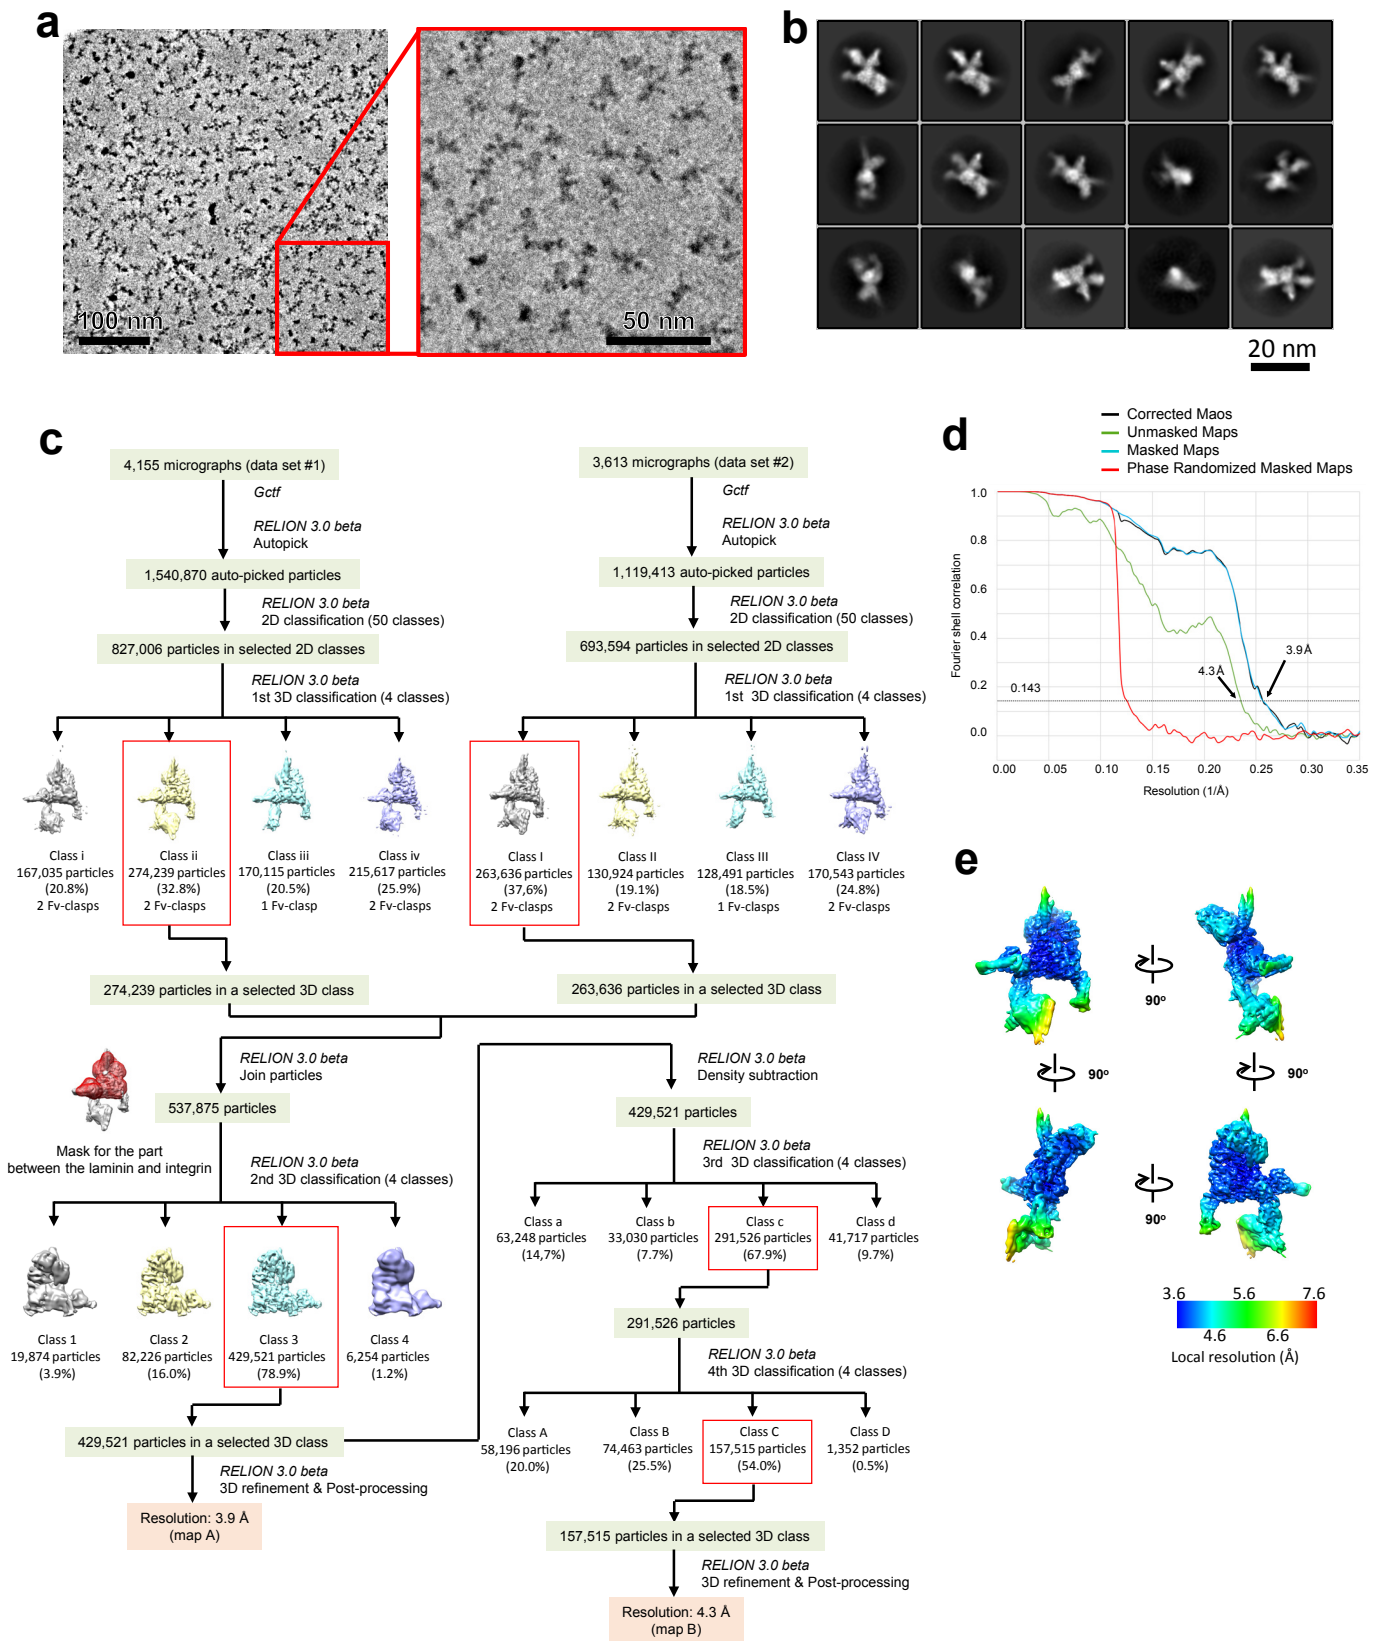

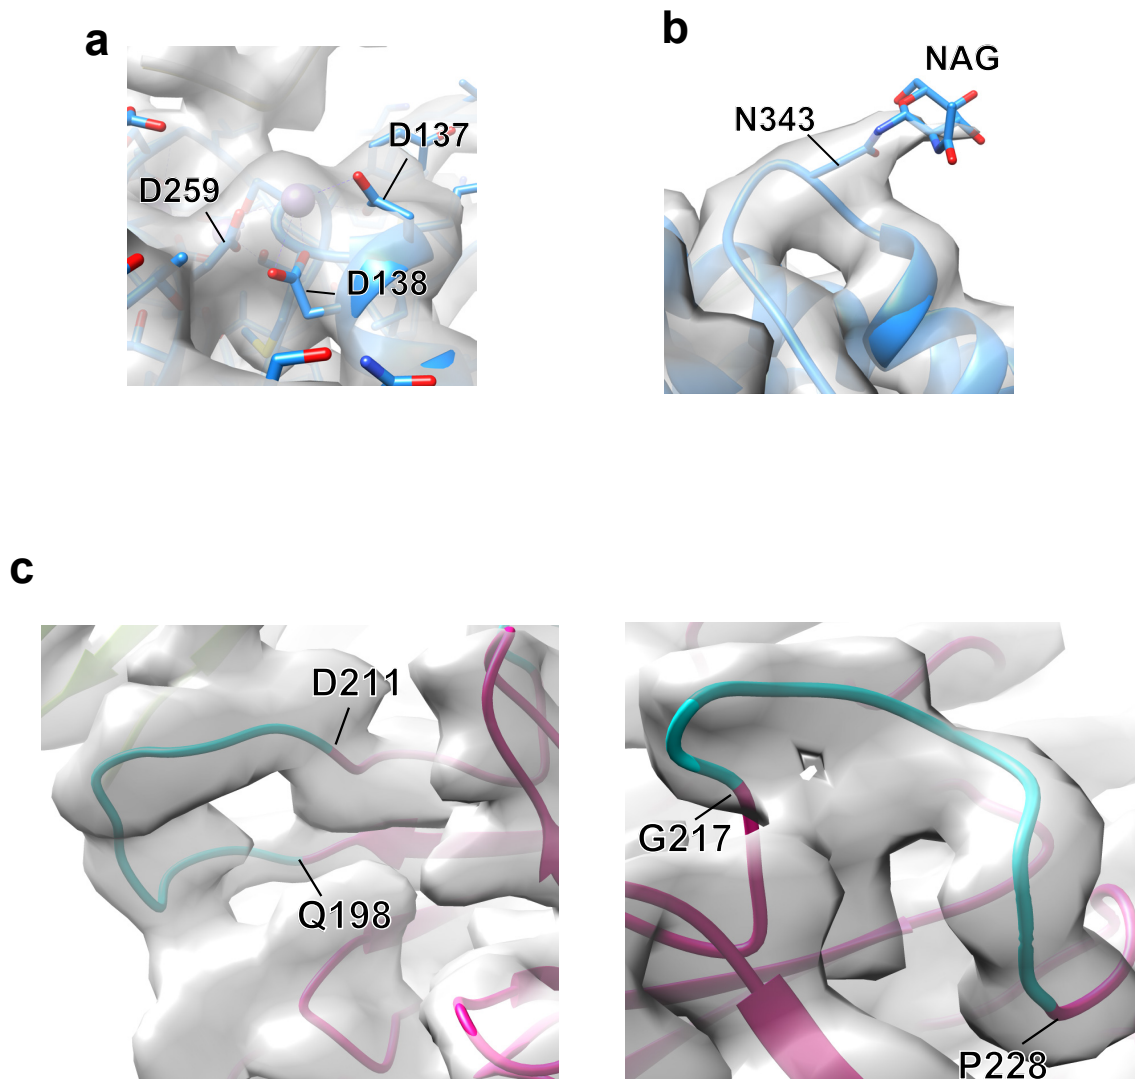

**Supplementary Fig. 4 Cryo-EM maps.**

**a**, Cryo-EM map near the ADMIDAS. The presence of a metal at this site is inferred by the observed volume surrounded by ADMIDAS-coordinating D137, D138, and D259. **b**, Cryo-EM map of the  $\alpha 6\beta 1$ -tLM511 complex near the *N*-acetylglucosamine (NAG)-bearing N343 located in the  $\beta 6$ - $\alpha 7$  loop of the  $\beta I$  domain. **c**, Cryo-EM map for the X1 region of integrin  $\alpha 6$  in the complex. Putative Ca path for the segments not included in the final model are shown in a different color (cyan) than the modeled regions (magenta). All maps are drawn at the contour level of 0.05 in Chimera.

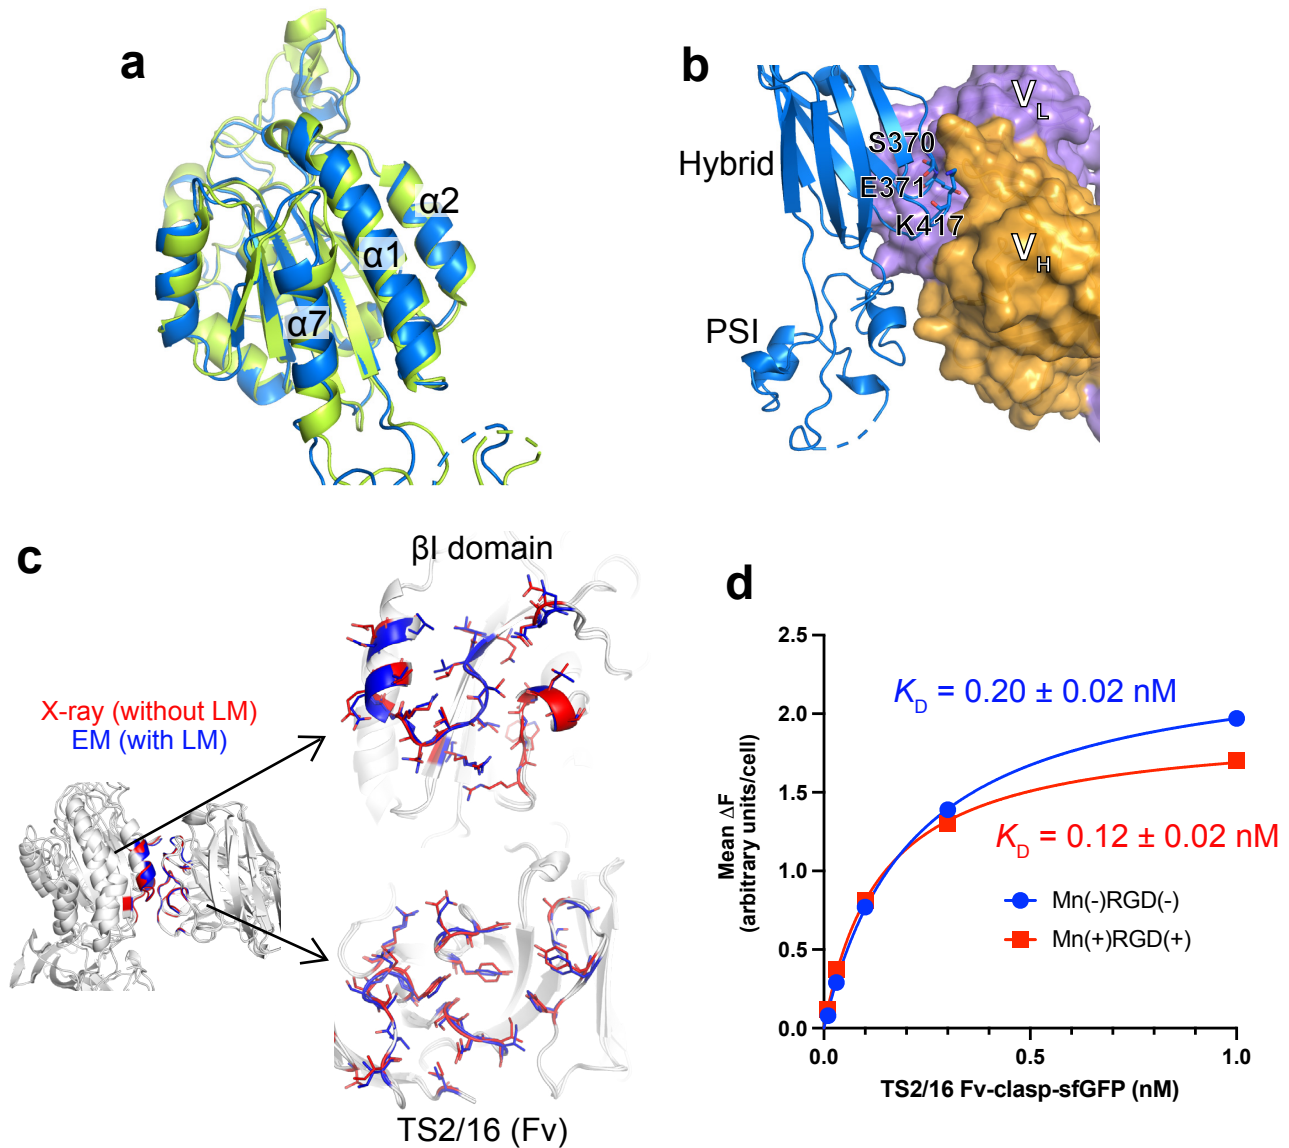

### Supplementary Fig. 5 Open conformation of the integrin $\beta 1$ chain and its interface with anti- $\beta 1$ antibodies.

**a**, Structural comparison of the  $\beta 1$  domain in the  $\alpha 6\beta 1$ -tLM511 complex (sky blue) with that of  $\alpha IIb\beta 3$  in the open-head conformation (PDB ID: 2vdo, light green). The two structures are superposed well, including the conformations of  $\alpha 1$  and  $\alpha 7$  helices. **b**, HUTS-4 binding site. HUTS-4 (surface model) recognizes continuous surface of  $\beta 1$  upper leg made by the hybrid domain and the upper portion of the PSI domain (ribbon model). Species-specific epitope residues determined previously (i.e., S370, E371, K417) are shown as stick models. **c**, Structural comparison of TS2/16 binding interface between the ligand unbound and bound states. Residues making a direct contacts ( $< 4\text{\AA}$ ) are highlighted in red (ligand unbound crystal structure) or blue (ligand-bound cryo-EM structure) and shown as stick models. The average  $C\alpha$  displacements upon the ligand binding are  $0.468\text{\AA}$  and  $0.509\text{\AA}$  for 16  $\beta 1$  domain residues and 17 TS2/16 residues, respectively. **d**, Affinity measurement of monomeric TS2/16 toward  $\alpha 5\beta 1$  on K562 cells. Concentration-dependent binding of sfGFP-fused TS2/16 Fv-clasp was evaluated as described in the Method under the resting (in the presence of  $1\text{ mM CaCl}_2$  and  $1\text{ mM MgCl}_2$ , blue) or maximally activated (in the presence of  $0.5\text{ mM MnCl}_2$ , and  $1\text{ mM RGD}$  peptide, red) conditions, and the equilibrium dissociation constants ( $K_D$ ) were derived from the binding isotherms by non-linear regression analysis. Data are mean  $\pm$  SD of three independent experiments, while the plots are from one representative experiment among them. Source data are provided as a Source Data file.

**a**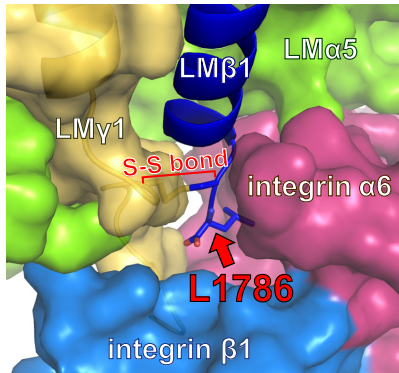**b**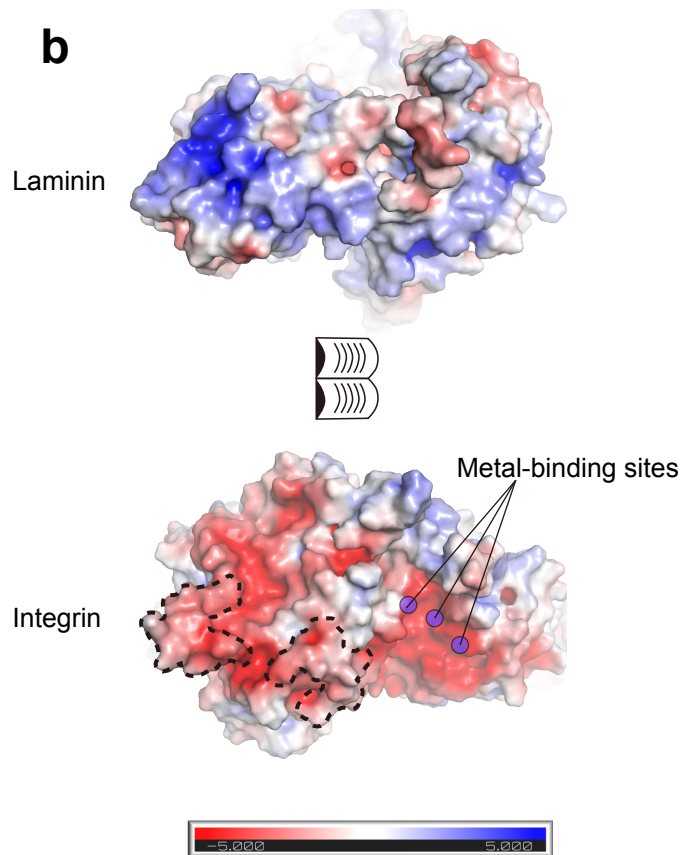

### Supplementary Fig. 6 Closer look at the $\alpha6\beta1$ -LM511 interface.

**a**, The C-terminus of the LM $\beta$ 1 chain contributes to the binding interface. The C-terminal L1786 (stick model) of the laminin  $\beta$ 1 chain (dark blue) is accommodated in a small dead-end space formed by integrin  $\alpha$ 6 (hot pink) and  $\beta$ 1 (sky blue) subunits and the laminin  $\gamma$ 1-tail (yellow). **b**, Electrostatic complementarity of the  $\alpha6\beta1$ -LM511 interface. Electrostatic surfaces of LM511 (top) and  $\alpha6\beta1$  (bottom) with a contour level of  $\pm 5$  kT/e are shown as an open book view similar to Fig.5a, except for using the  $\alpha$ 6 coordinates complemented with the putative models for loops flanking strand IIIId (corresponding regions indicated by dotted lines). Note that  $\beta$ 1 surface near the three metal-binding sites (blue dots) appearing strongly electronegative is partially neutralized by the positive charge of the metals.

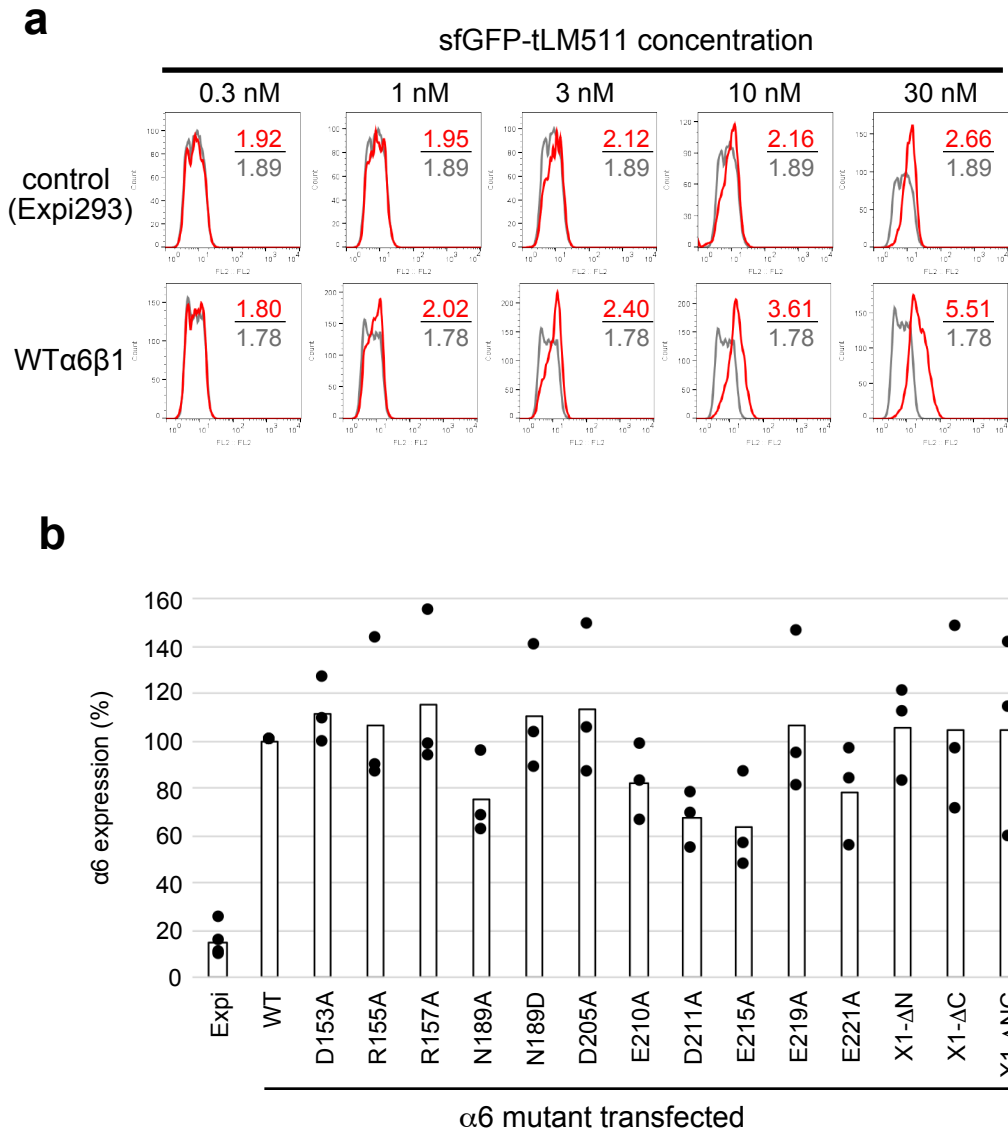

### Supplementary Fig. 7 Binding of sfGFP-tLM511 to cell-surface α6β1 integrin measured by flow cytometry.

**a**, Concentration-dependent binding of sfGFP-tLM511. Either control Expi293F cells or the same cells transfected with wild-type α6 and β1 integrin subunits were incubated with purified sfGFP-tLM511 for 2h in the presence of 0.5 mM MnCl<sub>2</sub>, and directly analyzed in a flow cytometer without any washing steps. The fluorescence signal associated with each cell is extracted from the acquired data in a linear scale, and values from all gated cells were integrated to obtain mean cellular fluorescence in an arbitrary unit, shown in red. These numbers, after subtracting the value from the histogram obtained with no sfGFP-tLM511 (gray histogram and gray numbers), were used to plot binding isotherms shown in Fig. 6d-f. **b**, Expression levels of full-length integrins. Cell-surface expression levels for various mutant α6 subunits were evaluated by measuring the mean fluorescent intensity (MFI) from the FACS staining using an anti-α6 integrin antibody GoH3 (#MAB1378, Merck-Millipore). The MFI values, after subtracting the value obtained with the control sample without GoH3, are normalized to that of wild-type (WT) and expressed as %. Shown are mean value of three independent measurements (rectangles), with each data point overlaid as black dot. Note that untransfected Expi293F cells show presence of endogenous α6 subunit at a level ~15% of the WT α6 overexpression. Source data are provided as a Source Data file.

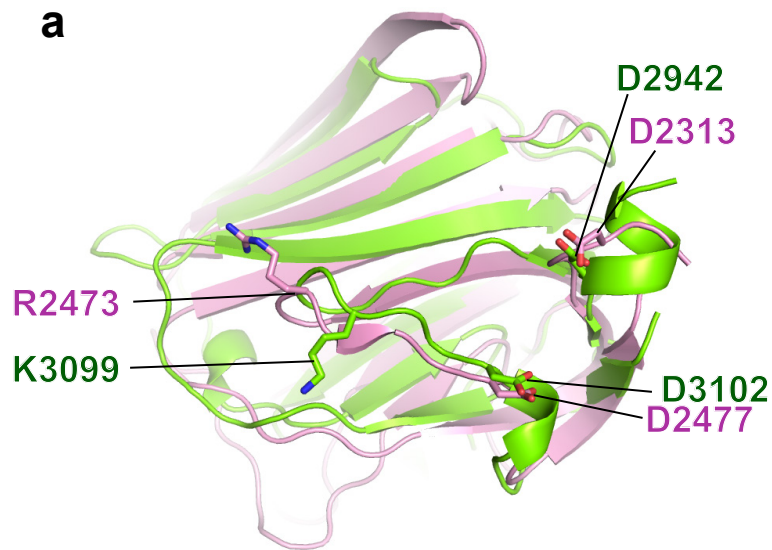

**b**

|                  |                                                                                       |
|------------------|---------------------------------------------------------------------------------------|
|                  | 2942                                                                                  |
| hLM $\alpha$ 5 : | DPWLT <b>D</b> G-SYLDGTGFARISFDSQI-STTKRFEQELRLVSYSGVLFFLKQ--QSQFLCLAVQEGLVLLYDFGAG   |
| mLM $\alpha$ 1 : | ---NEDSSFHFDGSGYAMVEKTLR--PTVTQIVILFSTFSPNGLLFYLASNGTKDFLSIELVRGRVKVMVDLGSG           |
| hLM $\alpha$ 1 : | ---NED <b>D</b> PSFHFDGSGYSVVEKSLP--ATVTQIIMLFNTFSPNGLLLYLGSYGTKDFLSIELFRGRVKVMTDLGSG |
|                  |                                                                                       |
| hLM $\alpha$ 5 : | LKKAVPLQPPPPLTSASKAIQVFLGGSRKRVLRVER-----ATVYSVE-----QDNDLELADAYYLGGVPPD              |
| mLM $\alpha$ 1 : | PLTLMT--DRRYNNGTWYKIAFQRN--RKQGLLAVFDAYDTSKQGETPGAASDLNRLEKDLIYV-GGLPHS               |
| hLM $\alpha$ 1 : | PITLLT--DRRYNNGTWYKIAFQRN--RKQGLVLAVIDAYNTSNKETKQGETPGASSDLNRLDKDPIYV-GGLPRS          |
|                  |                                                                                       |
|                  | 3099 3102                                                                             |
| hLM $\alpha$ 5 : | QLPPSLRRLFPTGGSVRGCVKGIKALG <b>K</b> Y-V <b>D</b> LKRLNTTGVSAG                        |
| mLM $\alpha$ 1 : | KAV----RKGVSSRSYVGCINKL-EIS <b>R</b> STF <b>D</b> LLRNS-YGVRKG                        |
| hLM $\alpha$ 1 : | RVV----RRGVTTKSFVGCINKL-EIS <b>R</b> STF <b>D</b> LLRNS-YGVRKG                        |

**Supplementary Fig. 8 Comparison of the laminin LG2 domain.**

**a**, Superposition of the LG2 domains of LM511 (cryo-EM structure, light green) and mLM111 (PDB ID: 5mc9, pink). The charged residues on LM511 where mutations were introduced in this study and their corresponding residues on mLM111 are shown as stick models. **b**, Sequence alignment of the LG2 domains among human laminin  $\alpha$ 5, mouse laminin  $\alpha$ 1, and human  $\alpha$ 1.



**Supplementary Table 1 X-ray diffraction data collection and refinement statistics**

|                                                         | $\alpha\beta 1$ headpiece-TS2/16 Fv-clasp complex<br>(PDB ID: 7ceb) | HUTS4 Fv-clasp<br>(PDB ID: 7cea) |
|---------------------------------------------------------|---------------------------------------------------------------------|----------------------------------|
| <b>Data collection</b>                                  |                                                                     |                                  |
| Space group                                             | <i>P2<sub>1</sub>2<sub>1</sub>2</i>                                 | <i>P3<sub>2</sub>21</i>          |
| Cell dimensions<br><i>a, b, c</i> (Å)                   | 116.5, 251.3, 63.3                                                  | 88.4, 88.4, 78.1                 |
| Resolution (Å)                                          | 47.83 – 2.89 (3.07 - 2.89) <sup>a</sup>                             | 44.18 - 2.55 (2.70 - 2.55)       |
| <i>R</i> <sub>sym</sub>                                 | 0.16 (1.23)                                                         | 0.10 (2.16)                      |
| <i>I</i> / $\sigma I$                                   | 12.48 (1.63)                                                        | 17.75 (1.75)                     |
| CC1/2                                                   | 0.997 (0.806)                                                       | 0.999 (0.899)                    |
| Completeness (%)                                        | 99.6 (97.7)                                                         | 99.8 (99.2)                      |
| Redundancy                                              | 9.8 (9.8)                                                           | 13.5 (14.2)                      |
| <b>Refinement</b>                                       |                                                                     |                                  |
| Resolution (Å)                                          | 44.6 - 2.89 (2.96- 2.89)                                            | 34.79 - 2.55 (2.8 - 2.55)        |
| No. reflections                                         | 42,218                                                              | 11,755                           |
| <i>R</i> <sub>work</sub> / <i>R</i> <sub>free</sub> (%) | 20.7/24.9 (33.1/39.0)                                               | 25.2/26.6 (42.5/43.2)            |
| No. atoms                                               |                                                                     |                                  |
| Proteins                                                | 9,540                                                               | 2,565                            |
| Carbohydrates                                           | 84                                                                  | -                                |
| Metal ions                                              | 5                                                                   | -                                |
| Water                                                   | 3                                                                   | -                                |
| <i>B</i> -factors                                       |                                                                     |                                  |
| Proteins                                                | 78.5                                                                | 92.3                             |
| Carbohydrates                                           | 97.9                                                                | -                                |
| Metal ions                                              | 83.2                                                                | -                                |
| Water                                                   | 62.8                                                                | -                                |
| R.m.s. deviations                                       |                                                                     |                                  |
| Bond lengths (Å)                                        | 0.004                                                               | 0.005                            |
| Bond angles (°)                                         | 0.774                                                               | 0.867                            |
| Validation                                              |                                                                     |                                  |
| MolProbity score                                        | 1.74                                                                | 2.00                             |
| Clashscore                                              | 8.45                                                                | 9.06                             |
| Poor rotamers (%)                                       | 0                                                                   | 1.76                             |
| Ramachandran plot                                       |                                                                     |                                  |
| Favored (%)                                             | 95.90                                                               | 95.31                            |
| Allowed (%)                                             | 4.10                                                                | 4.69                             |
| Disallowed (%)                                          | 0                                                                   | 0                                |
| C $\beta$ outliers (%)                                  | 0                                                                   | 0                                |

A single crystal was used for each structure determination.

<sup>a</sup>Values in parentheses are statistics of the highest-resolution shell.

**Supplementary Table 2 Cryo-EM data collection, refinement and validation statistics**

$\alpha 6\beta 1$  headpiece-tLM511 complex  
(EMDB-30342)  
(PDB 7cec)

---

| <b>Data collection and processing</b>            |                              |
|--------------------------------------------------|------------------------------|
| Magnification                                    | 59,000                       |
| Voltage (kV)                                     | 300                          |
| Electron exposure (e-/Å <sup>2</sup> )           | 40                           |
| Defocus range (μm)                               | -0.6 ~ -0.8                  |
| Pixel size (Å)                                   | 1.113                        |
| Symmetry imposed                                 | C1                           |
| Initial particle images (no.)                    | 2,660,283                    |
| Final particle images (no.)                      | 429,521                      |
| Map resolution (Å)                               |                              |
| FSC threshold                                    | 0.143                        |
| Map resolution (Å)                               | 3.9                          |
| <b>Refinement</b>                                |                              |
| Initial model used (PDB code)                    | 7ceb, 4wk0, 5xau, 5xcx, 7cea |
| Model resolution (Å)                             | 3.9                          |
| FSC threshold                                    | 0.5                          |
| Map sharpening <i>B</i> factor (Å <sup>2</sup> ) | -100                         |
| Model composition                                |                              |
| Non-hydrogen atoms                               | 17,561                       |
| Protein residues                                 | 17,442                       |
| Carbohydrates                                    | 112                          |
| Metal ions                                       | 7                            |
| <i>B</i> factors (Å <sup>2</sup> )               |                              |
| Protein                                          | 172.1                        |
| Carbohydrates                                    | 172.0                        |
| Metal ions                                       | 152.3                        |
| R.m.s. deviations                                |                              |
| Bond lengths (Å)                                 | 0.011                        |
| Bond angles (°)                                  | 1.202                        |
| Validation                                       |                              |
| MolProbity score                                 | 2.22                         |
| Clashscore                                       | 14.95                        |
| Poor rotamers (%)                                | 1.09                         |
| Ramachandran plot                                |                              |
| Favored (%)                                      | 91.26                        |
| Allowed (%)                                      | 8.69                         |
| Disallowed (%)                                   | 0.05                         |

---

## Supplementary Note

### Formation of a stable complex of $\alpha6\beta1$ integrin with LM511

We explored conditions where a stable complex of  $\alpha6\beta1$  with laminin is obtained, a prerequisite for the structural determination of the complex. Previously, we have established that a recombinantly produced truncated E8 fragment of LM511 (tLM511) retained full integrin-binding activity as well as an excellent crystallization property<sup>12</sup>. Thus we evaluated the stability of the complex between the  $\alpha6\beta1$  headpiece and tLM511 by using a size-exclusion chromatography (SEC). When the mixture was subjected to SEC in a buffer containing physiological concentration of divalent cations (*i.e.*, 1 mM MgCl<sub>2</sub>/1 mM CaCl<sub>2</sub>), both components eluted as uncomplexed species (Supplementary Fig. 2a, blue tracing) indicating a fast dissociation rate of the complex. In contrast, addition of TS2/16 resulted in the formation of stable complex appearing as a peak at ~10.1 ml (Supplementary Fig. 2a, green), although some dissociation was suspected by the trailing shape of the peak. Furthermore, the peak shape became nearly symmetrical when 1 mM Mn<sup>2+</sup> was included in the elution buffer (Supplementary Fig. 2b, green), suggesting that the most stable complex can be obtained in this condition. When the complex sample thus prepared was subjected to extensive crystallization screening, however, we could not obtain any diffraction-compatible crystals. We went further to include yet another anti-integrin antibody that may reduce the conformational heterogeneity. HUTS-4 is an anti-integrin  $\beta1$  antibody whose epitope is located in  $\beta1$  hybrid domain, which is predicted to be inaccessible when  $\beta1$  assumes low-affinity closed conformation but exposed when it is in the activated, open conformation<sup>40</sup>. This makes it one of the special anti-integrin antibodies collectively called ligand-induced binding site (LIBS) antibodies, and we speculated that HUTS-4 may stabilize the open-leg conformation of  $\alpha6\beta1$  headpiece and facilitate the crystallization. We prepared HUTS-4 Fv-clasp and tested its binding to  $\alpha6\beta1$  by SEC under various conditions. It was revealed that HUTS-4 failed to bind in a physiological buffer (*i.e.*, 1 mM Mg<sup>2+</sup> and Ca<sup>2+</sup>) (Supplementary Fig. 2d), and bound only partially in the presence of 1 mM Mn<sup>2+</sup> (Supplementary Fig. 2e). Although inclusion of the ligand (*i.e.*, tLM511) induced HUTS-4 binding in both conditions (Supplementary Fig. 2a, b, orange tracings), the shape of the elution peaks suggested incomplete formation of the complex, particularly under physiological cation conditions. Finally, we mixed all the components ( $\alpha6\beta1$  headpiece, tLM511, TS2/16 Fv-clasp, and HUTS-4 Fv-clasp) in the presence of 1 mM Mn<sup>2+</sup>, which gave very sharp peak in SEC (Supplementary Fig. 2b, magenta tracing) containing all components as confirmed by SDS-PAGE analysis (Supplementary Fig. 2c). This preparation was subjected to the cryo-EM single particle analysis and we succeeded in obtaining a 3.9Å-resolution structure of the quaternary complex.
